# Supplementary material for: BIN1 is a key regulator of proinflammatory and neurodegeneration-related activation in microglia
Source: PubMed Central journal article supplement (PMC9077874; doi:10.1186/s13024-022-00535-x), 2022-05-07

**A**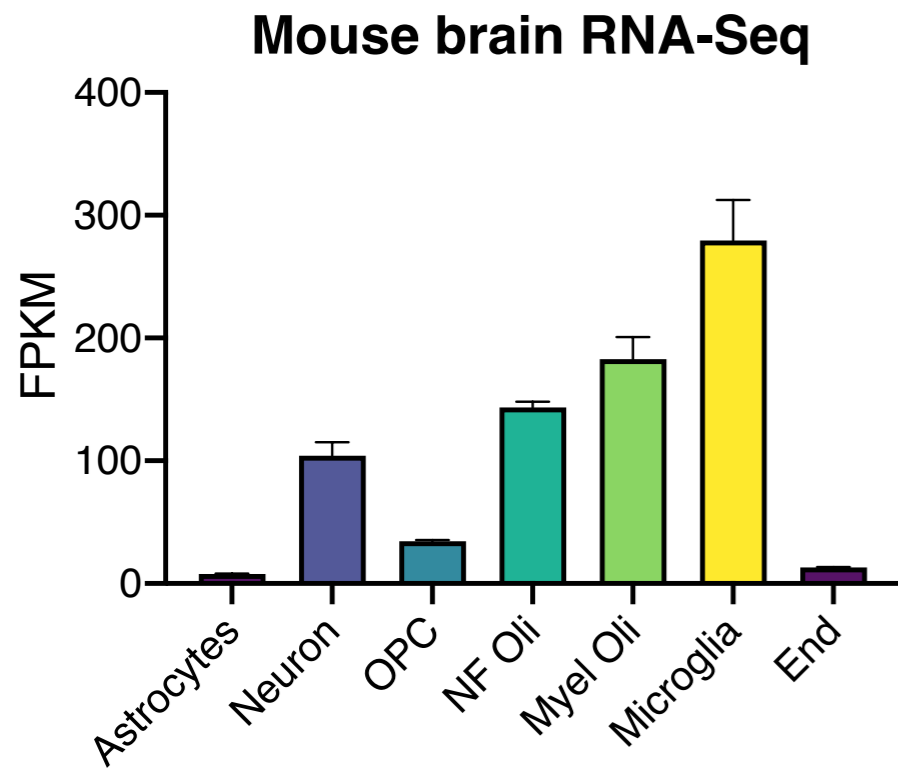**B**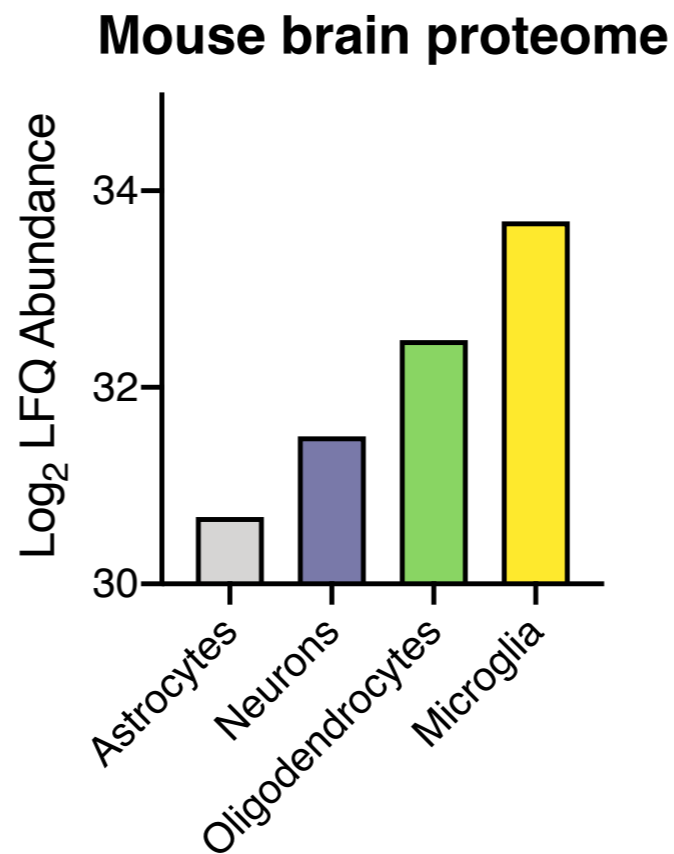**C**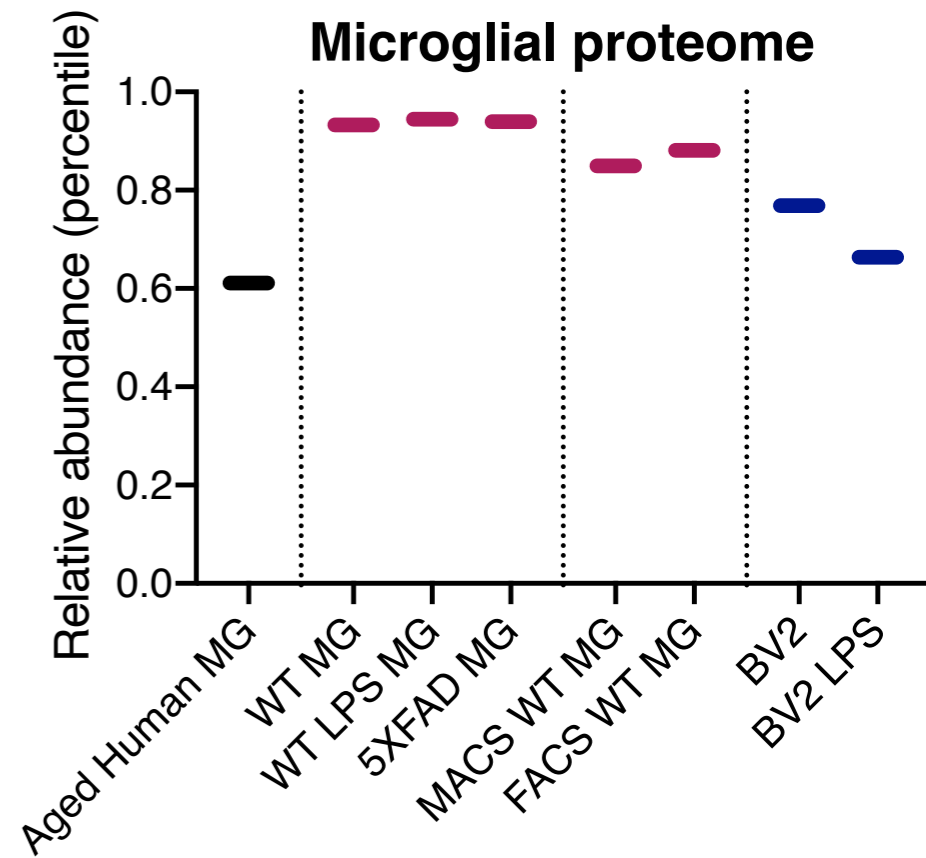**D**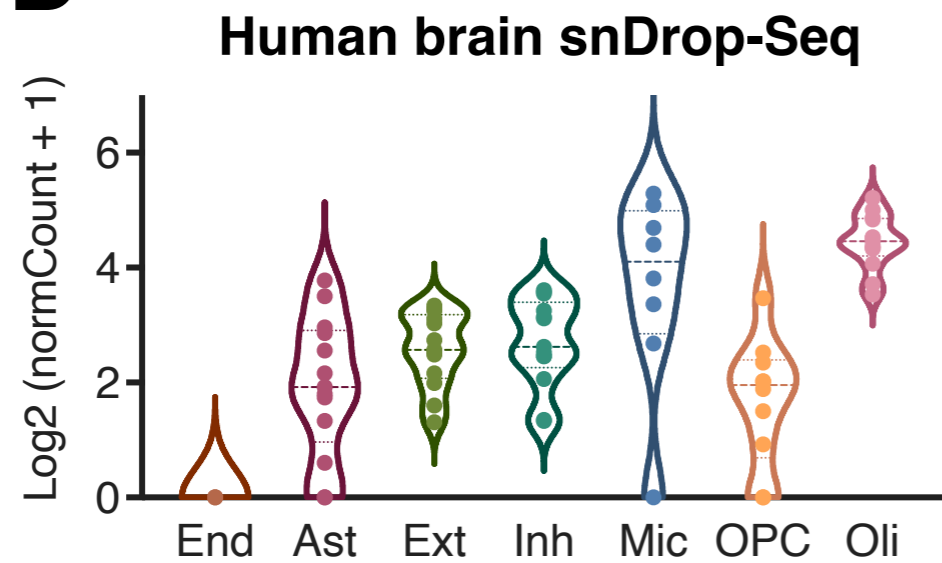**E**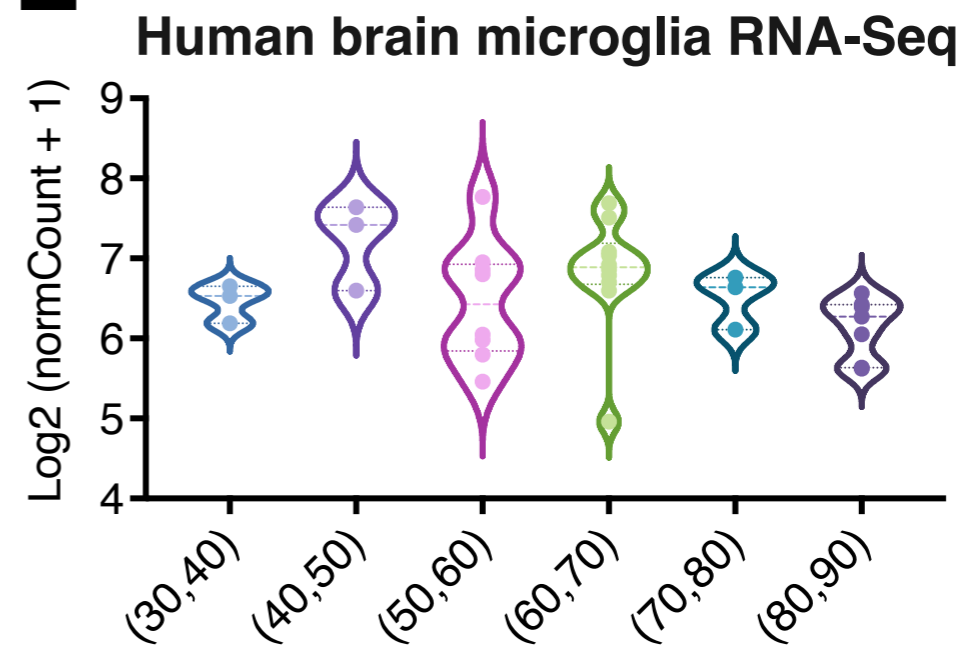

Supplement: 13024_2022_535_MOESM1_ESM.pdf [file 13024_2022_535_MOESM1_ESM.pdf]
